# Supplementary material for: Influence of light quality and nitrogen on colouration, biochemical composition and physiology of Chondracanthus teedei var. lusitanicus
Source: Research Square preprint supplement (doi:10.21203/rs.3.rs-7742430/v1), 2025-10-28
Supplement: Supplementary file 1 [file 76a2436cb8c793e29a5e7b42.docx]

**Supplementary material**

**Suppl. Table 1**. Two-way ANOVA showing the influence of light quality and nutrient addition on the Chlorophyll *a*, Phycocyanin, Phycoerythrin, Astaxanthin, β-carotene, Soluble Protein content, RGR, % N, Fv/Fm, ETRmax, αETR, Ek of *C. teedei*. df: Degrees of freedom. SS: Sum of squares. * p-value < 0.05; ** p-value < 0.01; *** p-value < 0.001.

| Factor | df | Chlorophyll *a* | | |  | Phycocyanin | | |  | Phycoerythrin | | |  | Astaxanthin | | |  |
| --- | --- | --- | --- | --- | --- | --- | --- | --- | --- | --- | --- | --- | --- | --- | --- | --- | --- |
| SS (x10) | F | p-val |  | SS | F | p-val |  | SS | F | p-val |  | SS (x104) | F | p-val |  |
| L | 3 | 2.977 | 6.07 | **0.003** | ** | 1.246 | 20.50 | **0.001** | *** | 10.53 | 26.66 | **0.001** | *** | 5.769 | 4.48 | **0.012** | * |
| N | 1 | 7.403 | 45.25 | **0.001** | *** | 3.977 | 196.24 | **0.001** | *** | 25.96 | 197.22 | **0.001** | *** | 4.403 | 10.25 | **0.004** | ** |
| L x N | 3 | 2.633 | 5.37 | **0.005** | ** | 0.135 | 2219 | 0.112 | *** | 4.66 | 11.8 | **0.001** | *** | 0.255 | 0.20 | 0.896 |  |
| Res | 24 | 3.927 |  |  |  | 0.486 |  |  |  | 3158 |  |  |  | 10.309 |  |  |  |
| Factor | df | β-carotene | | |  | Soluble Protein | | |  | RGR | | |  | % N | | |  |
| SS (x104) | F | p-val |  | SS | F | p-val |  | SS (x104) | F | p-val |  | SS | F | p-val |  |
| L | 3 | 1.937 | 1.14 | 0.353 |  | 16752 | 15.52 | **0.001** | *** | 5.06 | 2.15 | 0.120 |  | 0.67 | 1951 | 0.148 |  |
| N | 1 | 9.566 | 16.90 | **0.001** | * | 107560 | 298.93 | **0.001** | *** | 3.56 | 4.53 | **0.044** | * | 32.3 | 282849 | **0.001** | *** |
| L x N | 3 | 0.965 | 0.57 | 0.641 |  | 2740 | 2.54 | 0.080 |  | 0.58 | 0.25 | 0.862 |  | 0.89 | 2597 | 0.076 |  |
| Res | 24 | 13.586 |  |  |  | 8636 |  |  |  | 18.84 |  |  |  | 2.74 |  |  |  |
| Factor | df | Fv/Fm | | |  | ETRmax | | |  | αETR | | |  | Ek | | |  |
| SS (x103) | F | p-val |  | SS | F | p-val |  | SS (x104) | F | p-val |  | SS | F | p-val |  |
| L | 3 | 29.22 | 1.62 | 0.211 |  | 1.07 | 0.17 | 0.916 |  | 1.88 | 0.19 | 0.901 |  | 6.242 | 0.42 | 0.742 |  |
| N | 1 | 4.26 | 0.71 | 0.408 |  | 24.11 | 11.49 | **0.002** | ** | 5.78 | 1.76 | 0.197 |  | 23.217 | 4.66 | **0.041** | * |
| L x N | 3 | 10.98 | 0.61 | 0.616 |  | 14.34 | 2.28 | 0.105 |  | 12.96 | 1.32 | 0.291 |  | 14669 | 0.98 | 0.418 |  |
| Res | 24 | 14.42 |  |  |  | 50.37 |  |  |  | 78.66 |  |  |  | 119579 |  |  |  |

**Suppl. Table 2**. Scheirer Ray-Hare test showing the influence of light quality and nutrient addition on Fucoxanthin, C content and C/N ratio of *C. teedei*. df: Degrees of freedom. SS: Sum of squares. * p-value < 0.05; ** p-value < 0.01; *** p-value < 0.001.

| Factor | df | Fucoxanthin | | |  | % C | | |  | C/N | | |  |
| --- | --- | --- | --- | --- | --- | --- | --- | --- | --- | --- | --- | --- | --- |
| SS | MS | p-val |  | SS | MS | p-val |  | SS | MS | p-val |  |
| L | 3 | 110.5 | 1.26 | 0.740 |  | 888.25 | 10.09 | **0.018** | * | 162.75 | 1.85 | 0.604 |  |
| N | 1 | 2048 | 23.27 | **0.001** | * | 112.5 | 1.28 | 0.258 |  | 2048 | 23.27 | **0.001** | *** |
| L x N | 3 | 53.5 | 0.608 | 0.895 |  | 81.75 | 0.93 | 0.818 |  | 56.75 | 0.64 | 0.886 |  |
| Res | 24 | 516 |  |  |  | 1645.5 |  |  |  | 460.5 |  |  |  |

**Suppl. Table 3**. Content of Chlorophyll *a* (Chl*a*), Phycocyanin (PC), Phycoerythrin (PE), Astaxanthin (Ax), Fucoxanthin (Fuc) and -carotene (-caro) expressed as mg g-1 DW of *C. teedei* before and after 11 days incubation under different light qualities (Blue, Green, Amber, Red) and supplemented with (N+P) or without N (P).

| **Light quality** | **Nutrient enrichment** | **Chl *a*** | **PC** | **PE** | **Ax** | **Fuc** | **β-caro** |
| --- | --- | --- | --- | --- | --- | --- | --- |
| **Initial** | **-** | 0.404 ± 0.123 | 0.810 ± 0.041 | 1.379 ± 0.039 | 0.031 ± 0.008 | 0.012 ± 0.001 | 0.004 ± 0.006 |
| **Blue** | **P** | 0.189 ± 0.199 | 0.583 ± 0.082 | 0.534 ± 0.320 | 0.015 ± 0.013 | 0.008 ± 0.003 | 0.003 ± 0.005 |
| **N+P** | 0.805 ± 0.258 | 1.348 ± 0.275 | 3.616 ± 0.695 | 0.026 ± 0.009 | 0.121 ± 0.043 | 0.019 ± 0.009 |
| **Green** | **P** | 0.272 ± 0.037 | 0.225 ± 0.062 | 0.105 ± 0.054 | 0.010 ± 0.002 | 0.008 ± 0.004 | 0.013 ± 0.006 |
| **N+P** | 0.476 ± 0.059 | 0.762 ± 0.191 | 1.400 ± 0.454 | 0.017 ± 0.004 | 0.061 ± 0.026 | 0.021 ± 0.009 |
| **Amber** | **P** | 0.183 ± 0.019 | 0.154 ± 0.025 | 0.058 ± 0.004 | 0.007 ± 0.002 | 0.006 ± 0.002 | 0.009 ± 0.003 |
| **N+P** | 0.410 ± 0.059 | 0.791 ± 0.096 | 1.216 ± 0.276 | 0.014 ± 0.005 | 0.047 ± 0.017 | 0.017 ± 0.008 |
| **Red** | **P** | 0.155 ± 0.067 | 0.187 ± 0.076 | 0.092 ± 0.105 | 0.007 ± 0.004 | 0.007 ± 0.004 | 0.009 ± 0.006 |
| **N+P** | 0.325 ± 0.107 | 1.068 ± 0.154 | 1.762 ± 0.414 | 0.013 ± 0.004 | 0.042 ± 0.017 | 0.016 ± 0.008 |

**Suppl. Table 4**. RGR (% FW day-1), %C, %N and soluble protein content expressed as mg g-1 DW of *C. teedei* before and after 11 days incubation under different light qualities (Blue, Green, Amber; Red) and supplemented with (N+P) or without N (P).

| **Light quality** | **Nutrient enrichment** | **RGR** | **% C** | **% N** | **C/N** | **Soluble protein** |
| --- | --- | --- | --- | --- | --- | --- |
| **Initial** | **-** | - | 25.003 ± 1.672 | 2.571 ± 0.546 | 9.963 ± 1.551 | 141.082 ± 15.177 |
| **Blue** | **P** | 1.384 ± 0.952 | 27.618 ± 3.208 | 2.184 ± 0.372 | 12.758 ± 1.234 | 110.936 ± 20.217 |
| **N+P** | 2.458 ± 0.934 | 28.885 ± 1.760 | 3.724 ± 0.265 | 7.806 ± 0.978 | 226.452 ± 20.084 |
| **Green** | **P** | 1.684 ± 0.644 | 28.376 ± 1.302 | 1.607 ± 0.181 | 17.826 ± 2.152 | 66.649 ± 9.912 |
| **N+P** | 2.071 ± 1.131 | 28.468 ± 0.900 | 3.519 ± 0.471 | 8.191 ± 1.021 | 159.315 ± 10.026 |
| **Amber** | **P** | 1.984 ± 0.651 | 29.856 ± 2.362 | 1.603 ± 0.334 | 19.274 ± 4.558 | 84.885 ± 19.649 |
| **N+P** | 2.446 ± 0.236 | 30.882 ± 1.648 | 3.735 ± 0.552 | 8.452 ± 1.712 | 196.171 ± 21.941 |
| **Red** | **P** | 2.501 ± 1.070 | 30.052 ± 1.933 | 1.550 ± 0.135 | 19.565 ± 2.755 | 95.445 ± 17.206 |
| **N+P** | 3.244 ± 1.086 | 32.399 ± 1.484 | 4.005 ± 0.127 | 8.103 ± 0.601 | 239.786 ± 26.534 |

**Suppl. Table 5**. Photosynthetic performance parameters of *C. teedei* before and after 11 days incubation under different light qualities (Blue, Green, Amber; Red) and supplemented with (N+P) or without N (P). Data is represented as mean ± SD (n = 4).

| **Light quality** | **Nutrient enrichment** | **Fv/Fm** | **αETR** | **Ek** (µmol ph m-2 s-1) | **ETRmax** (µmol e- m-2 s-1) |
| --- | --- | --- | --- | --- | --- |
| **Initial** | **-** | 0.626 ± 0.026 | 0.129 ± 0.136 | 42.628 ± 37.083 | 2.671 ± 1.006 |
| **Blue** | **P** | 0.518 ± 0.112 | 0.046 ± 0.023 | 130.792 ± 63.287 | 4.968 ± 1.978 |
| **N+P** | 0.553 ± 0.038 | 0.047 ± 0.004 | 190.211 ± 35.654 | 8.901 ± 1.379 |
| **Green** | **P** | 0.556 ± 0.029 | 0.061 ± 0.026 | 129.027 ± 46.189 | 6.976 ± 0.314 |
| **N+P** | 0.495 ± 0.063 | 0.034 ± 0.015 | 238.399 ± 75.305 | 7.310 ± 0.739 |
| **Amber** | **P** | 0.483 ± 0.133 | 0.044 ± 0.022 | 186.924 ± 98.172 | 6.683 ± 1.997 |
| **N+P** | 0.436 ± 0.022 | 0.050 ± 0.011 | 175.920 ± 68.437 | 8.193 ± 1.721 |
| **Red** | **P** | 0.534 ± 0.075 | 0.048 ± 0.023 | 170.942 ± 93.786 | 6.673 ± 0.811 |
| **N+P** | 0.514 ± 0.074 | 0.035 ± 0.004 | 228.639 ± 60.513 | 7.840 ± 1.651 |

**Suppl. Table 6.** Two-way PERMANOVA showing the influence of light quality and nutrient addition on the final colour of *C. teedei*. df: Degrees of freedom. SS: Sum of squares.

| Source | df | SS | F | p-value |  |
| --- | --- | --- | --- | --- | --- |
| Light | 3 | 1342.7 | 3.4369 | 0.036 | * |
| Nutrient | 1 | 22783.1 | 174.9477 | 0.001 | *** |
| Light x Nutrient | 3 | 1354.4 | 3.4668 | 0.028 | * |
| Residuals | 24 | 3125.5 |  |  |  |
| * p-value < 0.05; ** p-value < 0.01; *** p-value < 0.001. | | | | |  |

**Suppl. Table 7.** Three-way PERMANOVA showing the influence of light quality, nutrient addition and days of incubation on the colour of *C. teedei*. df: Degrees of freedom. SS: Sum of squares.

| Source | df | SS | F | p-value | |  |
| --- | --- | --- | --- | --- | --- | --- |
| Light | 3 | 4234 | 19.96 | 0.001 | | *** |
| Nutrient | 1 | 24291 | 343.45 | 0.001 | | *** |
| Day | 3 | 6330 | 29.83 | 0.001 | | *** |
| Light x Nutrient | 3 | 2527 | 11.91 | 0.001 | | *** |
| Light x Day | 9 | 1407 | 2.21 | 0.02 | | * |
| Nutrient x Day | 3 | 10995 | 51.82 | 0.001 | | *** |
| Light x Nutrient x Day | 9 | 1464 | 2.30 | 0.017 | | * |
| Residual | 96 | 6790 |  |  | |  |
| Total | 127 | 58039 |  |  | |  |
| * p-value < 0.05; ** p-value < 0.01; *** p-value < 0.001. | | | | |
